# Supplementary material for: Structural and functional analysis of Utp24, an endonuclease for processing 18S ribosomal RNA
Source: PubMed Central journal article supplement (PMC5895043; doi:10.1371/journal.pone.0195723), 2018-04-11
Supplement: pone.0195723.s002.pdf [file pone.0195723.s002.pdf]

Table S1. Yeast strains used in this study

| Strain        | Genotype                                                                  | Origin          |
|---------------|---------------------------------------------------------------------------|-----------------|
| BY4741        | MATa, his3 $\Delta$ 1, leu2 $\Delta$ 0, met15 $\Delta$ 0, ura3 $\Delta$ 0 | Euroscarf       |
| ENP1-TAP      | BY4741, ENP1-TAP::HIS3MX                                                  | Open Biosystems |
| NOC4-TAP      | BY4741, NOC4-TAP::HIS3MX                                                  | Open Biosystems |
| Utp24 shuffle | BY4741, ENP1-TAP::HIS3MX, utp24::natNT2, [pRS416-GAL-HA-UTP24, URA3]      | This study      |
