# Supplementary material for: Structural and functional analysis of Utp24, an endonuclease for processing 18S ribosomal RNA
Source: PubMed Central journal article supplement (PMC5895043; doi:10.1371/journal.pone.0195723), 2018-04-11
Supplement: pone.0195723.s003.pdf [file pone.0195723.s003.pdf]

**S2 Table. Oligos used in this study**

| Oligo name       | Sequence(5'-3')                                                     | Usage                                                                                                                                                                                                                                                                                                                               |
|------------------|---------------------------------------------------------------------|-------------------------------------------------------------------------------------------------------------------------------------------------------------------------------------------------------------------------------------------------------------------------------------------------------------------------------------|
| pET28a-spUtp24-F | CAGATTGGTGGATCCATGGGTAAAGC<br>AAAAACTACACGCAAATTTG                  | In-Fusion primers for constructing<br>pET28a-His-Smt3-spUtp24                                                                                                                                                                                                                                                                       |
| pET28a-spUtp24-R | AGCCGGATCTCATTATCAATCCACCAC<br>ATCCACCAAAC                          |                                                                                                                                                                                                                                                                                                                                     |
| 416-scUtp24-F    | CGCTGGCACTAGTGCCGGCCGGATGG<br>GTAAAGCTAAGAAAACAAGAAAGTT<br>TG       | TPCR primers for constructing<br>pRS416-GAL-HA-scUtp24                                                                                                                                                                                                                                                                              |
| 416-scUtp24-R    | GGAGACTTGACCAAACCTCTGGCGA<br>AGTAAAAGACATCTGGCAATTTTTC<br>AATGACG   |                                                                                                                                                                                                                                                                                                                                     |
| L1               | CACCTTCATGTACCTATCGTTTGTGG                                          | Primers for deleting Utp24 gene from<br>yeast. The 5' and 3' arms of Utp24 gene<br>were amplified with primers L1 and L2<br>and L3 and L4, respectively, from yeast<br>genomic DNA. The natNT2 cassette was<br>amplified with overlap PCR using<br>primers L1 and L4 and templates of<br>pYM-N28 and the 5' and 3' arm of<br>Utp24. |
| L2               | CAAGGAGGGTATTCTGGGCCTCCATG<br>TCAATTAAGTGTAGTATATCGATAT<br>TTCCG    |                                                                                                                                                                                                                                                                                                                                     |
| L3               | GCTCTACATGAGCATGCCCTGCCCTA<br>AACTACTGTGTATCACTCTTTAAGTA<br>TGTA    |                                                                                                                                                                                                                                                                                                                                     |
| L4               | CTGCATCGCGTGGAACCCATG                                               |                                                                                                                                                                                                                                                                                                                                     |
| 415-scUtp24-F    | GATGACGATGACAAGATGGGTAAAGC<br>TAAGAAAACAAGAAAGTTTGG                 | In-Fusion primer for constructing<br>pRS415-GPD-FLAG-scUtp24 and<br>pRS415-GPD-FLAG-scUtp24 N                                                                                                                                                                                                                                       |
| 415-scUtp24-R    | GGTATCGATAAGCTTTTAAAAGACATC<br>TGGCAATTTTCAATGACG                   | In-Fusion primer for constructing<br>pRS415-GPD-FLAG-scUtp24 and<br>pRS415-GPD-FLAG-scUtp24 PIN                                                                                                                                                                                                                                     |
| 415-scUtp24-60-F | GATGACGATGACAAGATGAAGCCACC<br>TTATCAAGTACTGATAG                     | In-Fusion primer for constructing<br>pRS415-GPD-FLAG-scUtp24 PIN                                                                                                                                                                                                                                                                    |
| 415-scUtp24-60-R | GGTATCGATAAGCTTTTACTTTTATAGC<br>TTGATTGTATTGAAAGAAAAGTGC            | In-Fusion primer for constructing<br>pRS415-GPD-FLAG-scUtp24 N                                                                                                                                                                                                                                                                      |
| 415-spUtp24-F    | GATGACGATGACAAGATGGGTAAAGC<br>AAAAACTACACGC                         | In-Fusion primers for constructing<br>pRS415-GPD-FLAG-spUtp24                                                                                                                                                                                                                                                                       |
| 415-spUtp24-R    | GGTATCGATAAGCTTTCAATCCACCAC<br>ATCCACCAAAC                          |                                                                                                                                                                                                                                                                                                                                     |
| 415-hUtp24-F     | GATGACGATGACAAGATGGGGAAGC<br>AAAAGAAAACAAGG                         | In-Fusion primers for constructing<br>pRS415-GPD-FLAG-hUTP24                                                                                                                                                                                                                                                                        |
| 415-hUtp24-R     | GGTATCGATAAGCTTTTAGAATCGAGG<br>GGCTCCATAATC                         |                                                                                                                                                                                                                                                                                                                                     |
| 415-scNhPIN-F    | CATCGACTACAAGGATGACGATGACA<br>AGATGGGTAAAGCTAAGAAAACAAG<br>AAAGTTTG | TPCR primers for constructing<br>pRS415-GPD-FLAG-Utp24 (scN+hPIN)                                                                                                                                                                                                                                                                   |
| 415-scNhPIN-R    | GGTATCAACGAGGATGTGGTAAGGTG<br>GCTTTATAGCTTGATTGTATTGAAAGA           |                                                                                                                                                                                                                                                                                                                                     |

|                   |                                              |                                                           |
|-------------------|----------------------------------------------|-----------------------------------------------------------|
|                   | AAAGTG                                       |                                                           |
| QCscUtp24-D138N-F | CACAAGGGTACGTACGCGAATGACTG<br>TTTAGTGCATCGAG | QuikChange primers for<br>pRS415-GPD-FLAG-scUtp24 (D138N) |
| QCscUtp24-D138N-R | CTCGATGCACTAAACAGTCATTCGCG<br>TACGTACCCTTGTG |                                                           |
| QCscUtp24-C101A-F | CCCGTTAATCACAGATGGTGTGATGG<br>CAGAG          | QuikChange primers for<br>pRS415-GPD-FLAG-scUtp24 (C101A) |
| QCscUtp24-C101A-R | CTCTGCCATCACACCATCTGTGATTAA<br>CGGG          |                                                           |
| QCscUtp24-C130A-F | GAATAAAGAGACTAAGCGGTTTCGCAC<br>AAGGGTACG     | QuikChange primers for<br>pRS415-GPD-FLAG-scUtp24 (C130A) |
| QCscUtp24-C130A-R | CGTACCCTTGTGCGAACCGCTTAGTC<br>TCTTTATTC      |                                                           |
| QCscUtp24-H132A-F | GAGACTAAGCTGTTCGGCCAAGGGTA<br>CGTACGC        | QuikChange primers for<br>pRS415-GPD-FLAG-scUtp24 (H132A) |
| QCscUtp24-H132A-R | GCGTACGTACCCTTGGCCGAACAGCT<br>TAGTCTC        |                                                           |
| QCscUtp24-C140A-F | CGTACGCGGATGACGGTTTAGTGCAT<br>CGAG           | QuikChange primers for<br>pRS415-GPD-FLAG-scUtp24 (C140A) |
| QCscUtp24-C140A-R | CTCGATGCACTAAACCGTCATCCGCG<br>TACG           |                                                           |
| D-A2              | CGGTTTTAATTGTCCTA                            | Northern blot probes                                      |
| A2-A3             | ATGAAAACCTCCACAGTG                           |                                                           |
